# Supplementary material for: Cyclic oxygen exchange capacity of Ce-doped V2O5 materials for syngas production via high-temperature thermochemical-looping reforming of methane
Source: Royal Society of Chemistry journal article supplement (doi:10.1039/d1ra02234b), 2021-01-01
Supplement: d1ra02234b1.pdf [file d1ra02234b1.pdf]

## **Cyclic oxygen exchange capacity of Ce-doped V<sub>2</sub>O<sub>5</sub> materials for syngas production via high temperature chemical looping reforming of methane**

Asim Riaz<sup>a</sup>, Wojciech Lipinski<sup>a\*</sup>, Adrian Lowe<sup>a\*\*</sup>

<sup>a</sup> Research School of Electrical, Energy and Materials Engineering, The Australian National University, Canberra, ACT 2601, Australia.

\* Corresponding author. *E-mail*: [wojciech.lipinski@anu.edu.au](mailto:wojciech.lipinski@anu.edu.au); *Tel*: +61 2 612 57896

\*\* Corresponding author. *E-mail*: [adrian.lowe@anu.edu.au](mailto:adrian.lowe@anu.edu.au); *Tel*: +61 2 612 54881.

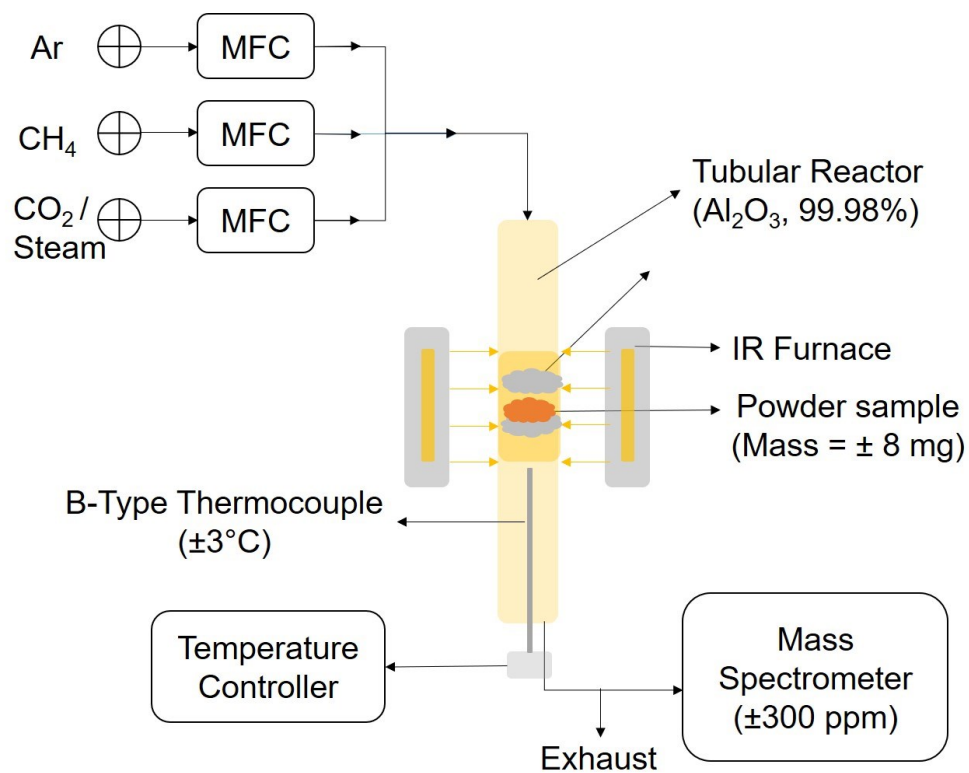

**Figure SI 1.** Schematic diagram of thermochemical testing setup.

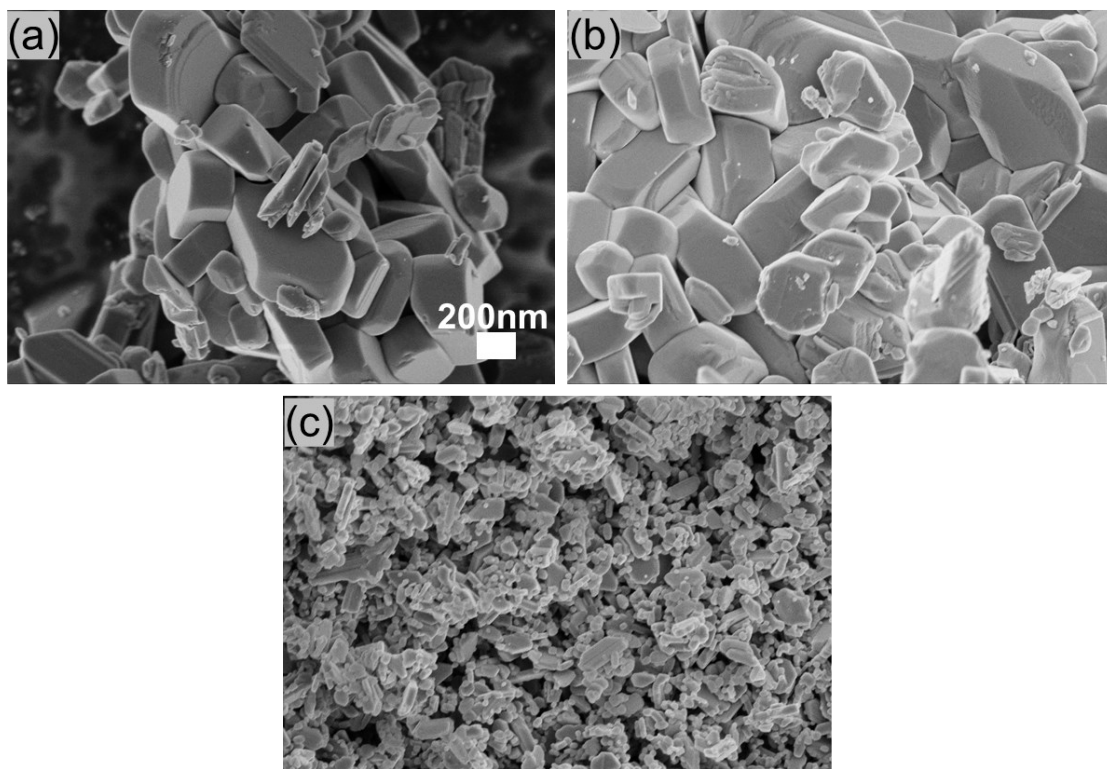

**Figure SI 2.** FESEM micrographs of as-prepared (a) pure  $V_2O_5$ , (b) 3CeV and (c) 9CeV powders.

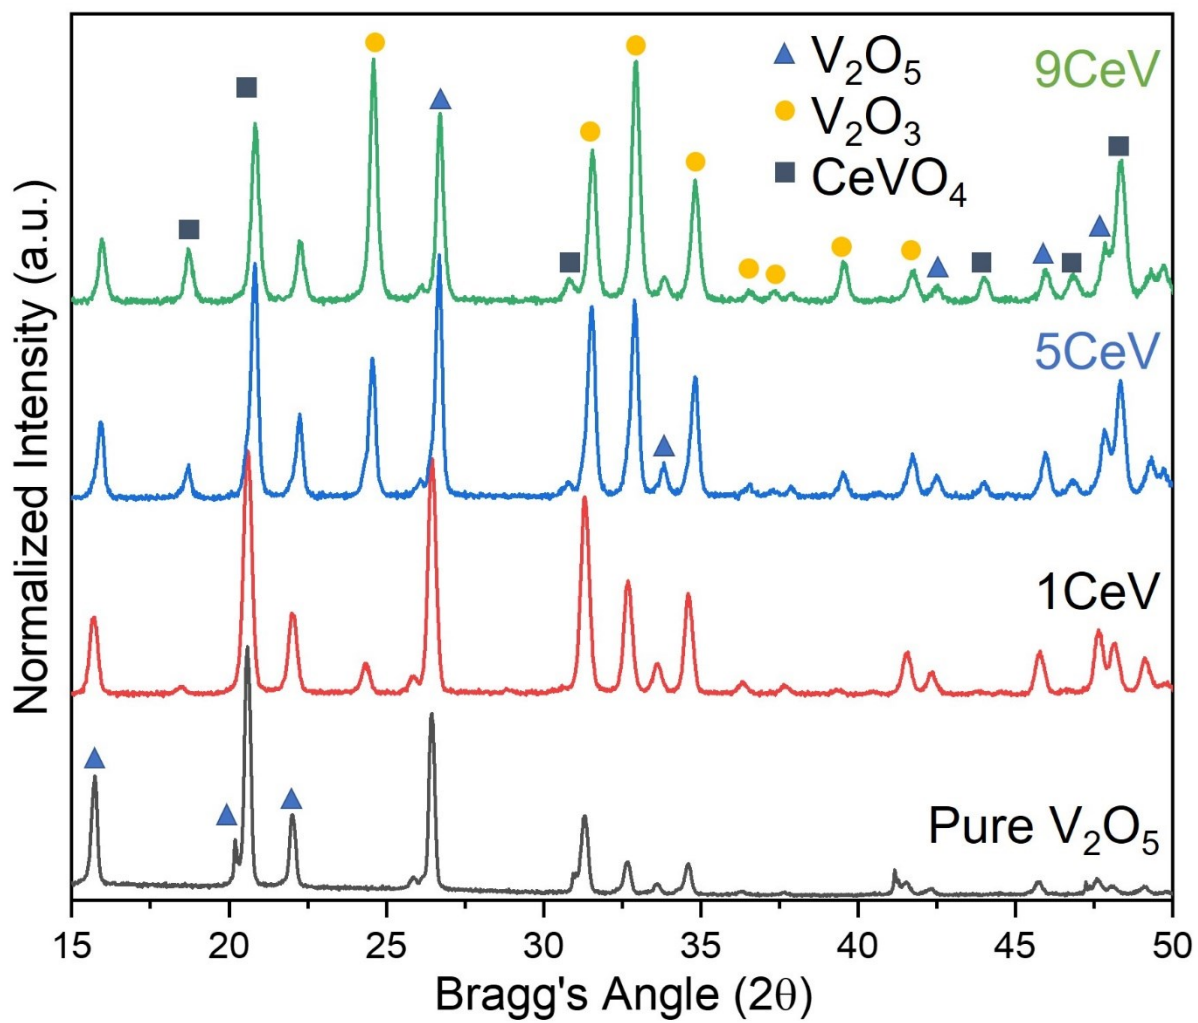

**Figure SI 3.** XRD patterns of as-prepared pure and Ce-doped  $V_2O_5$  powders

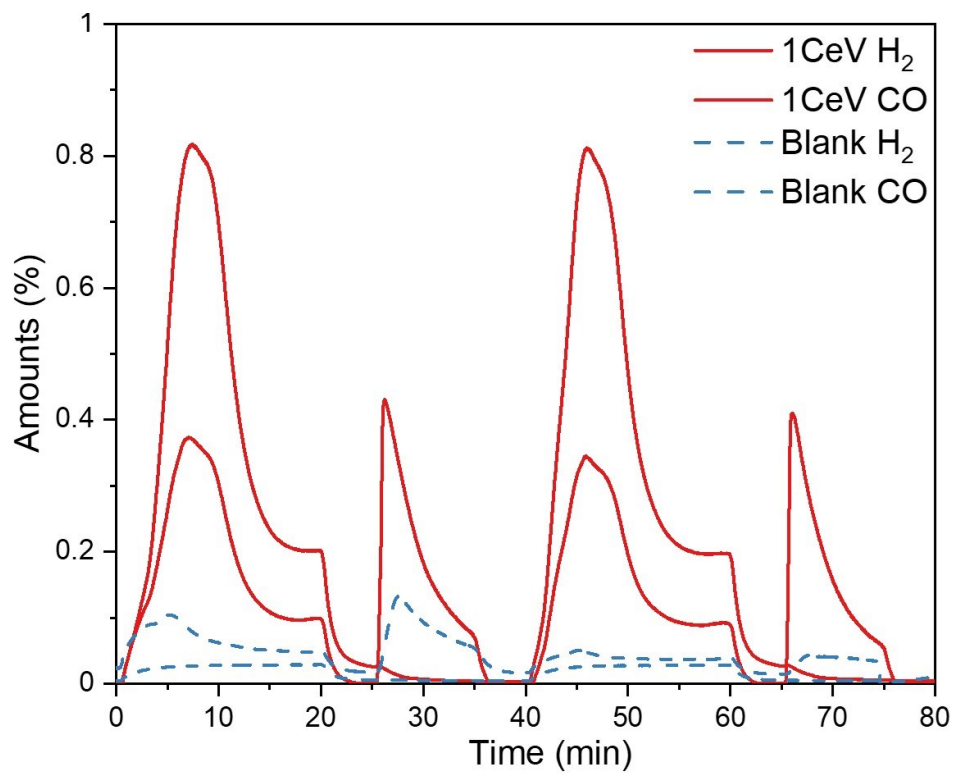

**Figure SI 4.** Mass-Spectrometer signals for H<sub>2</sub> and CO recorded during MPO-CDS redox cycles for blank and 1CeV samples.

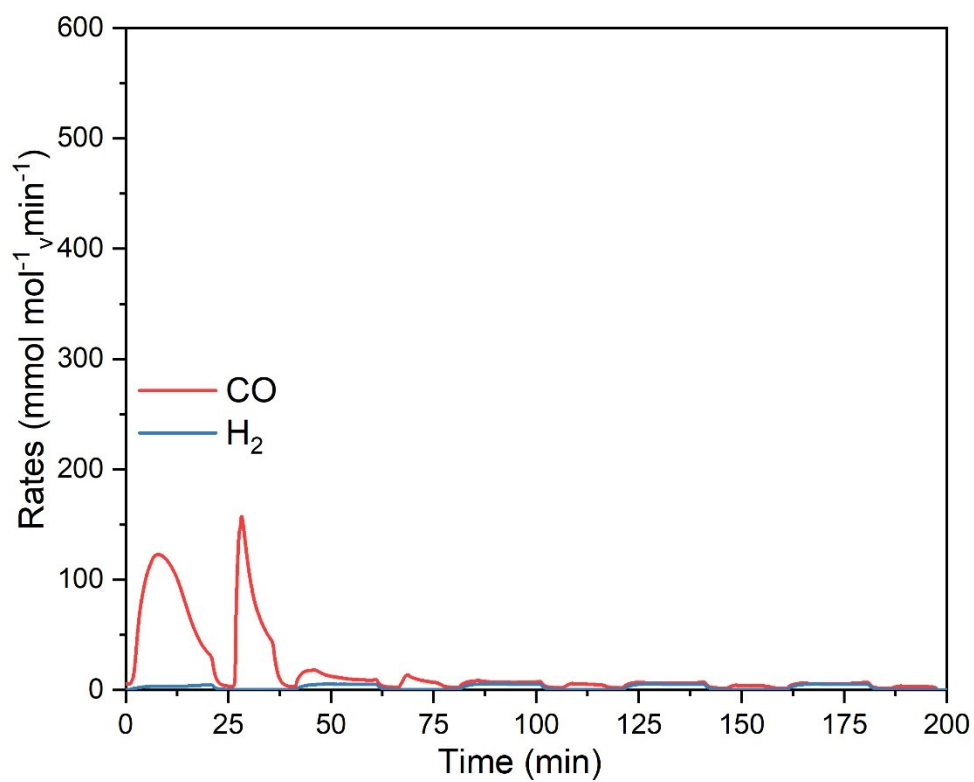

**Figure SI 5.** Syngas production rates produced by pure V<sub>2</sub>O<sub>3</sub> powders during 5 continuous MPO-CDS redox cycles.

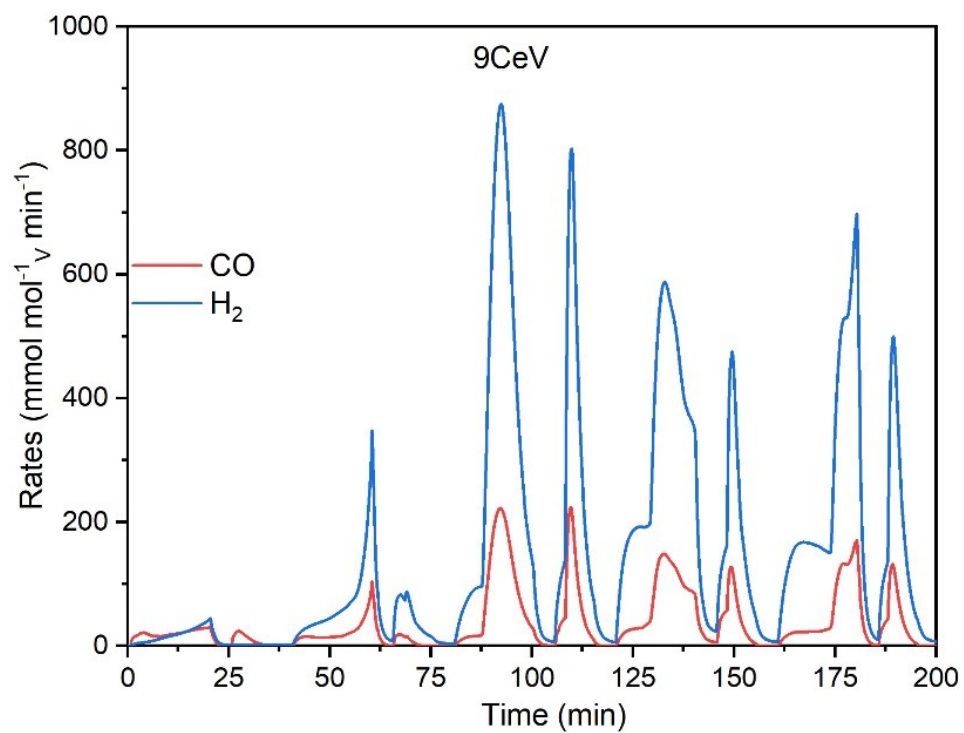

**Figure SI 6.** Syngas production rates produced by 9CeV powders during MPO–WS cycles.

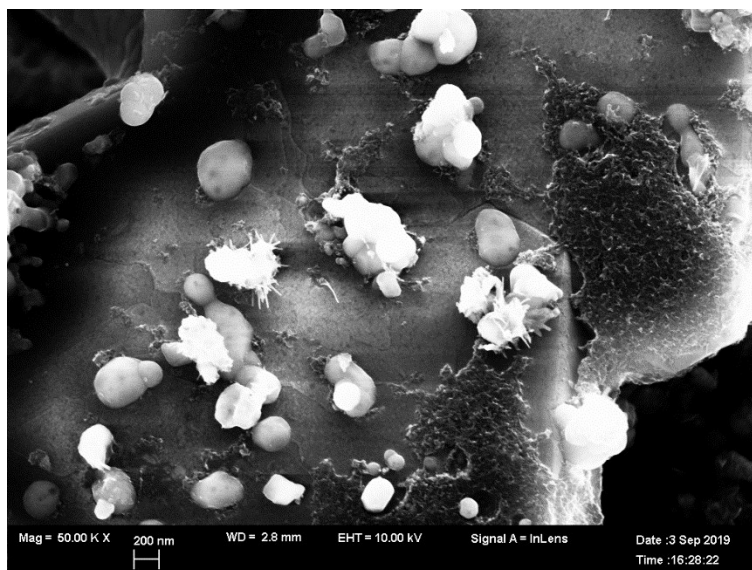

**Figure SI 7.** Back scattered SEM images of 3CeV powders, acquired after the MPO-CDS cycling.
